# Supplementary material for: Sestrin modulator NV-5138 produces rapid antidepressant effects via direct mTORC1 activation
Source: JCI journal article supplement (doi:10.1172/jci126859), 2019-04-16
Supplement: sd1 [file 1]

**Supplementary materials for**  
**Sestrin modulator NV-5138 produces rapid antidepressant effects via direct**  
**mTORC1 activation**

Taro Kato<sup>1,2</sup>, Santosh Pothula<sup>1</sup>, Rong-Jian Liu<sup>1</sup>, Catharine H. Duman<sup>1</sup>, Rosemarie  
Terwilliger<sup>1</sup>, George P. Vlasuk<sup>3</sup>, Eddine Saiah<sup>3</sup>, Seung Hahm<sup>3</sup>, and Ronald S. Duman<sup>1</sup>

Correspondence to: [Ronald.duman@yale.edu](mailto:Ronald.duman@yale.edu)

**This PDF file includes:**

Fig. S1. Effect of NV-5138 on the total fluid and water consumption in naïve or CUS rats

Fig. S2. Influence of NV-5138 on spine number and function in the PFC

Fig. S3. Effect of NV-5138 on the GAPDH levels

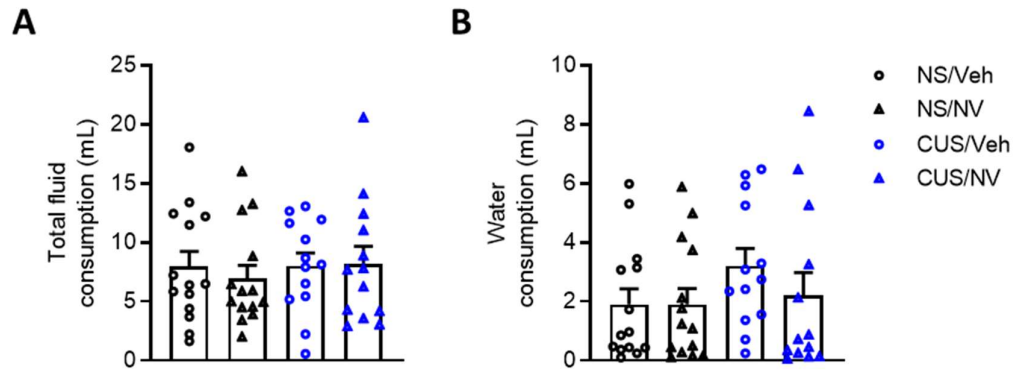

Supplemental Figure 1. Effect of NV-5138 on total fluid and water consumption in naïve and CUS rats. Neither CUS nor NV-5138 treatment altered total fluid (A) or water (B) consumption (in mL) on the test day. There were no statistically significant effects observed on total fluid consumption (effect of CUS:  $F_{1,50} = 0.287$ ,  $p = 0.59$ , effect of NV-5138:  $F_{1,50} = 0.1$ ,  $p = 0.75$ , interaction (CUS vs. NV-5138):  $F_{1,50} = 0.23$ ,  $p = 0.64$ ) or water consumption (effect of CUS:  $F_{1,50} = 1.72$ ,  $p = 0.20$ , effect of NV-5138:  $F_{1,50} = 0.68$ ,  $p = 0.41$ , interaction (CUS vs. NV-5138):  $F_{1,50} = 0.70$ ,  $p = 0.41$ ). Results are expressed as mean  $\pm$  S.E.M.  $n = 13$ - $14$ /group.  $p > 0.05$ , Two-way ANOVA and post hoc Tukey's multiple comparison test.

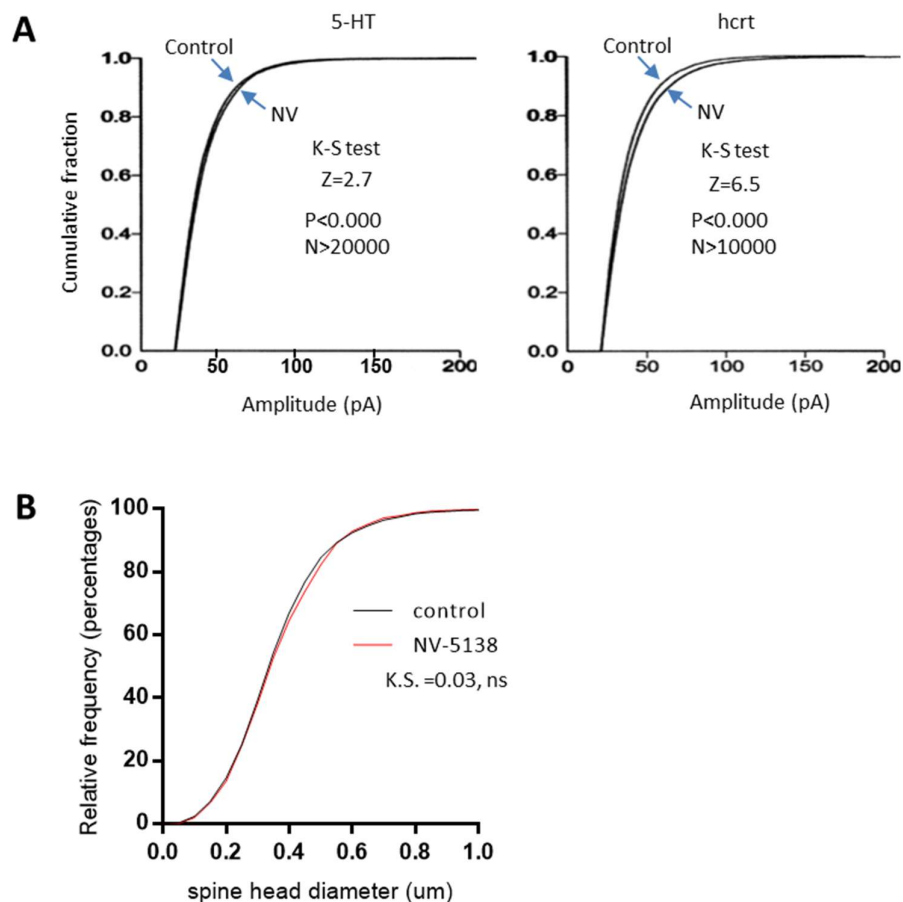

**Supplemental Figure 2. Influence of NV-5138 on spine number and function in the PFC.** Layer V pyramidal neurons in mPFC brain slices were recorded 24 hr after vehicle or NV5138 administration as described in Figure 6. (A) Cumulative probability distributions showing significantly increased amplitudes for 5-HT and hypocretin (hcrt) (Kolmogorov–Smirnov two-sample test;  $p = 0.0000$ ,  $z$  value = 2.7 for 5-HT;  $p = 0.000$ ,  $z$  value = 6.5 for hypocretin). (B) Cumulative probability distribution showing the effect of NV-5138 on spine head diameter in layer V neurons (Kolmogorov–Smirnov two-sample test;  $p = 0.03$ , not significant).

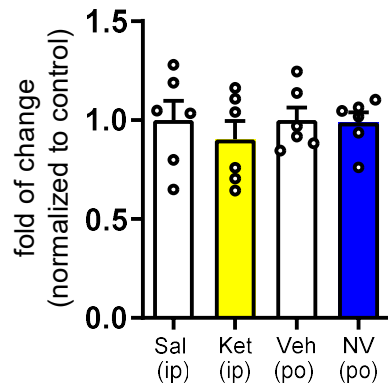

Supplemental Figure 3. Effect of NV-5138 on GAPDH levels in PFC. (a) Rats were administered saline or ketamine (10 mg/kg) or vehicle or NV-5138 (160 mg/kg) and PFC dissections were collected 24 hr later. Levels of the GAPDH as determined by western blot analysis were unaltered by ketamine or NV-5138 treatments. The results are shown as mean  $\pm$  S.E.M.  $n = 6/\text{group}$ .  $p > 0.05$ , Student's  $t$ -test.
